# Supplementary material
Source: MDPI journal article supplement (https://www.mdpi.com/2073-4344/12/10/1284)
Supplement: s1 [file s1 › catalysts-1956873-supplementary.pdf]

## Supplementary Information

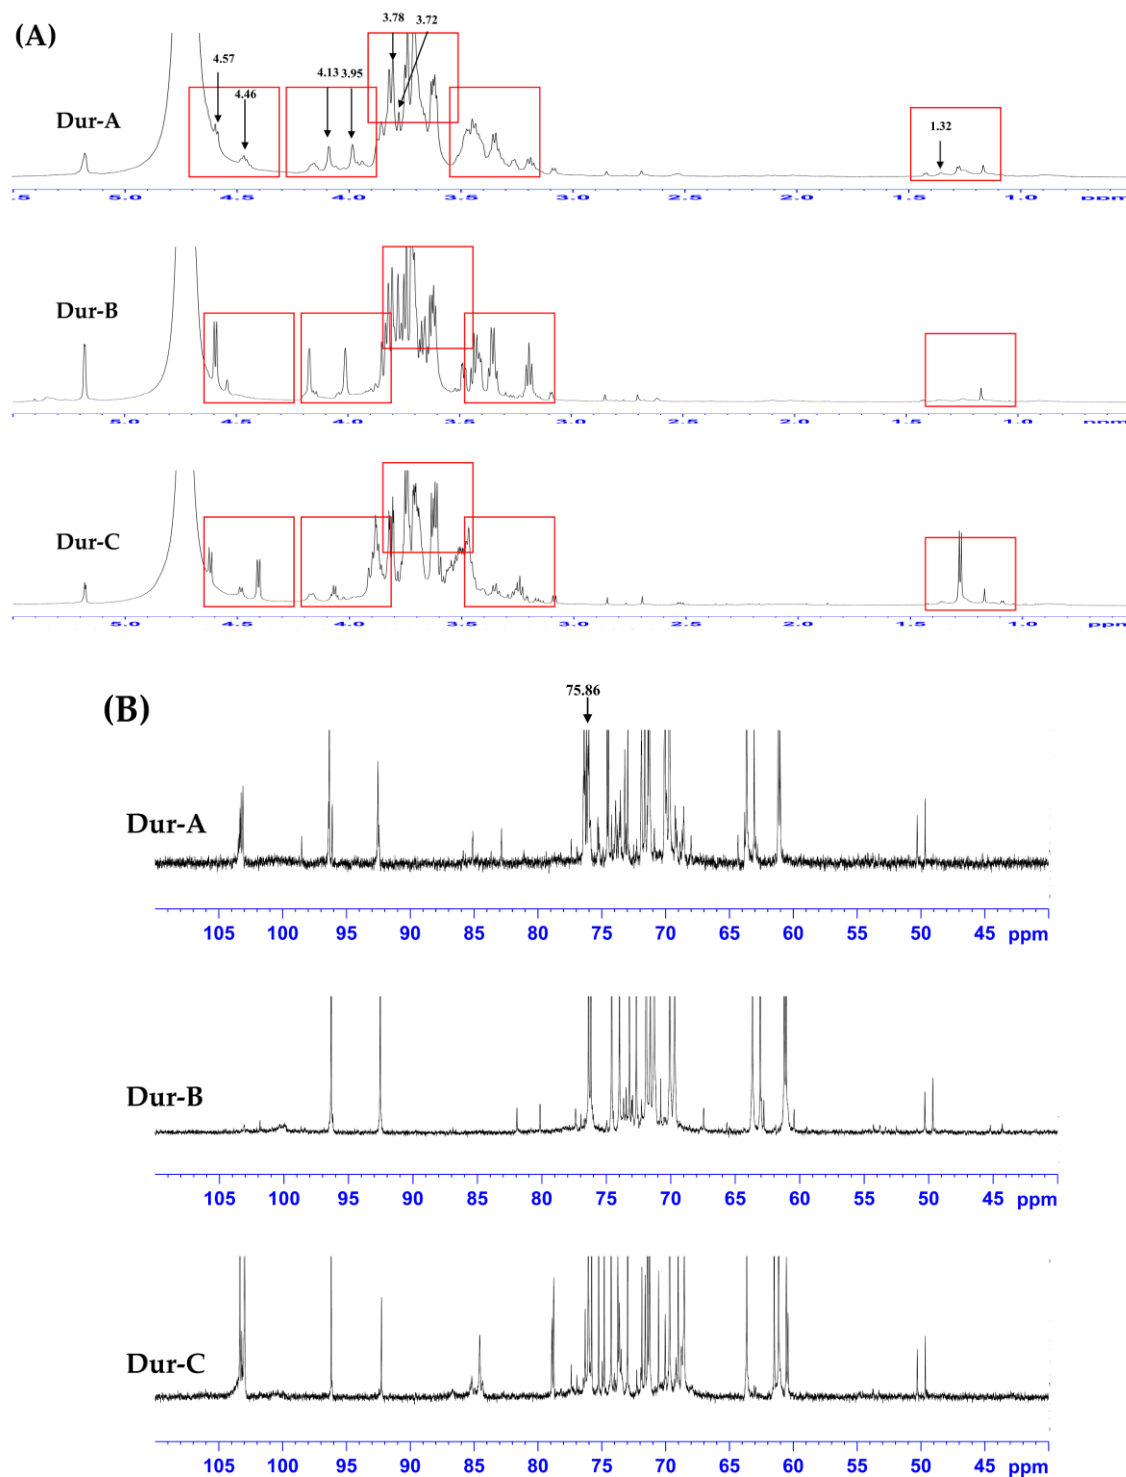

**Figure S1.** NMR analyses of Dur-A, Dur-B, and Dur-C. (A)  $^1\text{H}$ -NMR spectra of Dur-A, Dur-B, and Dur-C. (B)  $^{13}\text{C}$ -NMR spectra of Dur-A, Dur-B, and Dur-C. The characteristic peaks are indicated in each graph.
